# Supplementary material for: Survival and predictors of asphyxia among neonates admitted in neonatal intensive care units of public hospitals of Addis Ababa, Ethiopia, 2021: a retrospective follow-up study
Source: PubMed Central journal article supplement (PMC9087963; doi:10.1186/s12887-022-03238-w), 2022-05-10
Supplement: 12887_2022_3238_MOESM1_ESM.pdf [file 12887_2022_3238_MOESM1_ESM.pdf]

## **APPENDIX**

### **Annex I: Information sheet**

This tool is prepared for the collection of socio-demographic, obstetric, neonatal, clinical, laboratory, treatment and outcome-related information that are important for the assessment of survival status and predictors of survival among asphyxiated neonates admitted in neonatal intensive care units of public hospitals, Addis Ababa, Ethiopia, 2021. This can provide empirical evidence for health professionals and program planners. And also, it can fill the information gap to some extent on survival and predictors of recovery from perinatal asphyxia. All this information was retrieved from the individual patient record without including the names of the clients and medical record numbers. This information was collected by health care providers (BSc Nurses) who are working at the hospital NICU clinics and the collected data will not be revealed to anyone except the principal investigators.

Lastly, if you want any more information, you can contact us at the address listed below.

### **Contact information:**

1. Fekadeselassie Belege Cell phone +251912891577  
Email address --- [fekadebelege@gmail.com](mailto:fekebebe@gmail.com)

**Annex II: Data extraction form (Checklist)**

Data collection date \_\_\_\_ / \_\_\_\_ / 2013 E.c

Name of the Hospital -----

Name of data collector ----- signature-----

Name of supervisor -----signature-----

Code no -----

Is baby asphyxiated    Yes     No     ( If no stop filling the questioner)  
**If yes, stage of PNA at initial diagnosis = \_\_\_\_\_**  
 Date of admission \_\_\_\_ / \_\_\_\_ / \_\_\_\_\_ E.c  
 Admission diagnosis = \_\_\_\_\_

**Part I: Socio demographic characteristic**

| No  | Socio demographic information | Possible answers                        | Remark |
|-----|-------------------------------|-----------------------------------------|--------|
| 101 | Age of the mother             | _____ years                             |        |
| 102 | Place of residency            | 1. Addis Ababa<br>2. Out of Addis Ababa |        |

**PART-II Obstetric characteristics**

|     |                              |                                                                                        |  |
|-----|------------------------------|----------------------------------------------------------------------------------------|--|
| 201 | Parity                       | _____                                                                                  |  |
| 202 | Gravida                      | _____                                                                                  |  |
| 203 | Previous history of abortion | 1. Yes                      2. No                                                      |  |
| 204 | ANC visit                    | _____                                                                                  |  |
| 205 | Place of delivery            | 1. Inborn                      2. Out born                                             |  |
| 206 | Modes of delivery            | 1. Spontaneous Vertex delivery<br>2. Assisted Vaginal delivery<br>3. Caesarian section |  |
| 207 | Duration of labor            | _____ hours    _____ minutes                                                           |  |

|                                                         |                                        |                                                                                                                                  |                                             |  |
|---------------------------------------------------------|----------------------------------------|----------------------------------------------------------------------------------------------------------------------------------|---------------------------------------------|--|
| 208                                                     | Duration of ROM                        | 1. $\leq$ 18 hours<br>2. $>$ 18 hours                                                                                            |                                             |  |
| 209                                                     | Amniotic fluid                         | 1. Clear<br>2. Meconium stained _____ (grade)                                                                                    |                                             |  |
| 210                                                     | Type of pregnancy                      | 1. Singleton<br>2. Twin<br>3. Other (specify) _____                                                                              |                                             |  |
| 211                                                     | Pregnancy related conditions           | Anemia                                                                                                                           | 1. Yes 2. No                                |  |
|                                                         |                                        | Ante-partum hemorrhage                                                                                                           | 1. Yes 2. No                                |  |
|                                                         |                                        | Gestational DM                                                                                                                   | 1. Yes 2. No                                |  |
|                                                         |                                        | Preeclampsia/ Eclampsia                                                                                                          | 1. Yes 2. No                                |  |
|                                                         |                                        | Oligohydramnios                                                                                                                  | 1. Yes 2. No                                |  |
|                                                         |                                        | Fetal distress                                                                                                                   | 1. Yes 2. No                                |  |
|                                                         |                                        | Cord problems                                                                                                                    | 1. Yes 2. No                                |  |
|                                                         |                                        | If others, specify                                                                                                               | _____                                       |  |
| <b>Part III: Neonatal characteristics</b>               |                                        |                                                                                                                                  |                                             |  |
| 301                                                     | Sex of baby                            | 1. Male 2. Female                                                                                                                |                                             |  |
| 302                                                     | Gestational age                        | _____ weeks _____ days                                                                                                           |                                             |  |
| 303                                                     | Birth weight                           | _____ grams                                                                                                                      |                                             |  |
| 304                                                     | Did the baby cry                       | 1. Yes 2. No                                                                                                                     |                                             |  |
| 306                                                     | Age at presentation                    | _____ hours                                                                                                                      |                                             |  |
| <b>Part IV: Clinical and Laboratory characteristics</b> |                                        |                                                                                                                                  |                                             |  |
| 401                                                     | APGAR score                            | 1. 1 <sup>st</sup> min = _____ 2. 5 <sup>th</sup> min = _____<br>3. 10 <sup>th</sup> min = _____ 4. 20 <sup>th</sup> min = _____ |                                             |  |
| 402                                                     | Depressed clinical status at admission | Level of consciousness                                                                                                           | 1. Normal<br>2. Lethargic<br>3. Hyper alert |  |
|                                                         |                                        | Tone                                                                                                                             | 1. Normal<br>2. Hypotonic                   |  |

|     |                                                                                            |                                  |                                             |                                     |
|-----|--------------------------------------------------------------------------------------------|----------------------------------|---------------------------------------------|-------------------------------------|
|     |                                                                                            |                                  | 3. Hypertonic                               |                                     |
|     |                                                                                            | Reflexes                         | 1. Normal<br>2. Depressed<br>3. Exaggerated |                                     |
| 403 | Vital sign, SpO <sub>2</sub> and RBS at admission, 6hr, 12hrs. and 24 hrs. after admission | 1. Respiratory Rate              | ___, ___,<br>___, ___ b/min                 |                                     |
|     |                                                                                            | 2. Pulse rate                    | ___, ___,<br>___, ___ b/min                 |                                     |
|     |                                                                                            | 3. Temperature rate              | ___, ___,<br>___, ___ °C                    |                                     |
|     |                                                                                            | 4. Oxygen saturation             | ___, ___,<br>___, ___ %                     |                                     |
|     |                                                                                            | 5. Random blood sugar            | ___, ___,<br>___, ___ mg/dl                 |                                     |
| 404 | Serum electrolyte within 24 hours                                                          | Sodium                           | _____ mmol/L                                | If get 2 result take the repeat one |
|     |                                                                                            | Potassium                        | _____ mmol/L                                |                                     |
|     |                                                                                            | Chloride                         | _____ mmol/L                                |                                     |
|     |                                                                                            | Calcium (Ionized)                | _____ mmol/L                                |                                     |
| 405 | Complete blood count within 24 hours                                                       | White blood cell count           | _____ k                                     |                                     |
|     |                                                                                            | Hematocrit                       | _____ %                                     |                                     |
|     |                                                                                            | Platelet                         | _____ k                                     |                                     |
| 406 | Liver function test                                                                        | Aspartate Aminotransferase (AST) | _____ u/L                                   |                                     |
|     |                                                                                            | Alanine aminotransferase (ALT)   | _____ u/L                                   |                                     |
|     |                                                                                            | Total bilirubin                  | _____ mg/dl                                 |                                     |
|     |                                                                                            |                                  |                                             |                                     |

|                                                                        |                                                            |                                                                                                                                                                                                                                                                                                    |                                                                                                                                                      |  |
|------------------------------------------------------------------------|------------------------------------------------------------|----------------------------------------------------------------------------------------------------------------------------------------------------------------------------------------------------------------------------------------------------------------------------------------------------|------------------------------------------------------------------------------------------------------------------------------------------------------|--|
| 407                                                                    | Medical complications developed during their hospital stay | <ol style="list-style-type: none"> <li>1. Hypoglycemia</li> <li>2. Hyperbilirubinemia</li> <li>3. Necrotizing enterocolitis</li> <li>4. Acute kidney injury</li> <li>5. Thrombocytopenia</li> <li>6. Seizure</li> <li>7. Sepsis (Hospital Acquired Infections)</li> <li>8. Others _____</li> </ol> |                                                                                                                                                      |  |
| <b>Part V: Treatment related factors</b>                               |                                                            |                                                                                                                                                                                                                                                                                                    |                                                                                                                                                      |  |
| 501                                                                    | How managed the baby                                       | Resuscitation                                                                                                                                                                                                                                                                                      | <ol style="list-style-type: none"> <li>1. Bag mask ventilation</li> <li>2. Chest compression</li> <li>3. Intubation</li> <li>4. Adrenalin</li> </ol> |  |
| Antibiotics                                                            |                                                            | <ol style="list-style-type: none"> <li>1. Yes</li> <li>2. No</li> </ol>                                                                                                                                                                                                                            |                                                                                                                                                      |  |
| Aminophylline                                                          |                                                            | <ol style="list-style-type: none"> <li>1. Yes</li> <li>2. No</li> </ol>                                                                                                                                                                                                                            |                                                                                                                                                      |  |
| Oxygen                                                                 |                                                            | <ol style="list-style-type: none"> <li>1. Direct O<sub>2</sub></li> <li>2. CPAP</li> </ol>                                                                                                                                                                                                         |                                                                                                                                                      |  |
| Fluid management                                                       |                                                            | <ol style="list-style-type: none"> <li>1. Two third</li> <li>2. Total fluid</li> </ol>                                                                                                                                                                                                             |                                                                                                                                                      |  |
| Calcium gluconate with in first day of life                            |                                                            | <ol style="list-style-type: none"> <li>1. Yes</li> <li>2. No</li> </ol>                                                                                                                                                                                                                            |                                                                                                                                                      |  |
| <b>Part VI: Outcomes of the neonates and length of hospitalization</b> |                                                            |                                                                                                                                                                                                                                                                                                    |                                                                                                                                                      |  |
| 601                                                                    | Final outcome                                              | Recovered <input type="checkbox"/> Censored <input type="checkbox"/>                                                                                                                                                                                                                               |                                                                                                                                                      |  |
| 602                                                                    | Date of discharge                                          | ____/____/____ E.c                                                                                                                                                                                                                                                                                 |                                                                                                                                                      |  |
| 603                                                                    | Length of hospitalization                                  | _____ hours / days                                                                                                                                                                                                                                                                                 |                                                                                                                                                      |  |
